# Supplementary material
Source: PubMed Central journal article supplement (PMC7196631)
Supplement: supp_RA119.011682_156807_2_supp_492386_q74ktf.pdf [file supp_RA119.011682_156807_2_supp_492386_q74ktf.pdf]

## Supporting Information

### Modification of a PE/PPE substrate pair reroutes an Esx substrate pair from the mycobacterial ESX-1 type VII secretion system to the ESX-5 system

Merel P.M. Damen<sup>1#</sup>, Trang H. Phan<sup>1#</sup>, Roy Ummels<sup>2</sup>, Alba Rubio-Canalejas<sup>1</sup>, Wilbert Bitter<sup>2</sup>, Edith N.G. Houben<sup>1\*</sup>

<sup>1</sup>Section Molecular Microbiology, Amsterdam Institute of Molecular and Life Sciences, Vrije Universiteit Amsterdam, Amsterdam, The Netherlands

<sup>2</sup>Department of Medical Microbiology and Infection Control, Amsterdam Infection & Immunity Institute, Amsterdam UMC, Amsterdam, The Netherlands

**Running title:** PE/PPE determine system-specificity of Esx substrates

\*Corresponding author: Edith N.G. Houben

E-mail: [e.n.g.houben@vu.nl](mailto:e.n.g.houben@vu.nl)

#These authors contributed equally to this work.

**Keywords:** mycobacteria, protein secretion, substrate specificity, tuberculosis, western blot, gene knockout, type VII secretion, ESX-1, EsxA, PPE68

#### Material included:

- Table S1
- Table S2
- Table S3
- Figure S1
- Figure S2
- Figure S3
- Figure S4

**Table S1.** Strains used in this study.

| <b>Strain</b>                       | <b>References</b>                                                                                    |
|-------------------------------------|------------------------------------------------------------------------------------------------------|
| WT <i>M. marinum</i> M              | (29)                                                                                                 |
| <i>eccCb1</i> mutant (ESX-1 mutant) | (32)                                                                                                 |
| <i>eccC5</i> mutant (ESX-5 mutant)  | This study, complete deletion of <i>eccC5</i> in the genome of <i>M. marinum</i> M background strain |

**Table S2.** Primers used in this study.

| Primers used in this study  | Sequence                                                                 | Purpose of use                                                     |
|-----------------------------|--------------------------------------------------------------------------|--------------------------------------------------------------------|
| pe35-NheI-Fw                | CCCGCTAGCATGCGATCCATGTCTTTTGA                                            | cloning <i>pe35/ppe68_1mmar</i> into pSMT3                         |
| ppe68_Flag Rv               | TCACTTGTCGTCATCGTCTTTGTAGTCCCAGT<br>CGTCGTCGTCATC                        | to clone the cluster <i>pe35/ppe68_1/esxB_1/EsxA_1</i> into pSMT3  |
| Flag_esxB Fw                | GACTACAAAGACGATGACGACAAGTGAGAGT<br>CGTTGCTAAAAAGGACTTTC                  | to clone the cluster <i>pe35/ppe68_1/esxB_1/EsxA_1</i> into pSMT3  |
| esxA HA tag BamHI Rv        | CCCCCGGATCCTTAAGCTAAGCATAATCAGG<br>A<br>ACATCATACGGATAGCCGAACATCCCCG     | to clone the cluster <i>pe35/ppe68_1/esxB_1/EsxA_1</i> into pSMT3  |
| ppe68_1 Flag_HindIII<br>RV  | CCCCCAAGCTTTCACCTTGTCGTCATCGTCTTT<br>GT<br>AGTCCCAGTCGTCGTCGTCATC        | to clone <i>pe35/ppe68_1</i> with FLAG tag into pMV                |
| pe35 EcoRI FW               | CCCCCGAATTCATGCGATCCATGTCTTTTGAC<br>C<br>CCG                             | to clone <i>pe35/ppe68_1</i> with FLAG tag into pMV                |
| pe35_1 SWAP pe31 ss<br>Rv   | CGTTGGCGGTTTCGGTGCTCAGGTACGAGGC<br>C<br>GCGATCTGCCGC                     | to clone the secretion signal of <i>pe31</i> into <i>pe35_1</i>    |
| pe31 ss flank ppe68_1<br>FW | CACCGAAACCGCCAACGCCGTGGCATCTCAA<br>T<br>AGTCGGCCTGCCAAC                  | to clone the secretion signal of <i>pe31</i> into <i>pe35_1</i>    |
| esxB Fw esxN                | GTCTCGCAAATGGGCTTCTGACGCGCAAAG<br>C<br>CAC                               | exchange 15 aa of secretion signal of <i>esxB</i> into <i>esxM</i> |
| esxB Rv esxM                | CTAGCCGCGGAGGACCTGCTGGGAAGCCTGC<br>T<br>CTTGCTGCTCGTAGTTGTTACCGGCCTGACGG | exchange 15 aa of secretion signal of <i>esxM</i> into <i>esxB</i> |
| ppe68_1 Flag_HindIII<br>RV  | CCCCCAAGCTTTCACCTTGTCGTCATCGTCTTT<br>GT<br>AGTCCCAGTCGTCGTCGTCATC        | to clone <i>pe35/ppe68_1</i> with FLAG tag into pMV                |
| pe35 EcoRI FW               | CCCCCGAATTCATGCGATCCATGTCTTTTGAC<br>CC<br>CG                             | to clone <i>pe35/ppe68_1</i> with FLAG tag into pMV                |
| esxB NheI Fw                | CCCCCGCTAGCATGGCAGAGATGAAGACCGA<br>T<br>GC                               | to clone <i>esxB_1/esxA_1</i> into pSMT3                           |

**Table S3.** Plasmids used in this study.

|      | <b>Plasmids</b>                                                    | <b>Characteristics</b>                                                                                          | <b>Gene origin</b>  | <b>Reference</b> |
|------|--------------------------------------------------------------------|-----------------------------------------------------------------------------------------------------------------|---------------------|------------------|
| I    | pMV:: <i>pe35/ppe68_1WT-FLAG</i>                                   | hsp60 promoter, KanR, integrative                                                                               | <i>M. marinum</i> M | This study       |
| II   | pSMT3:: <i>esxB_1/EsxA_1WT-HA</i>                                  | hsp60 promoter, hygRO                                                                                           | <i>M. marinum</i> M | This study       |
| III  | pSMT3:: <i>pe35/ppe68_1-FLAG/esxB_1/esxA_1-HA WT ALL WT</i>        | hsp60 promoter, hygRO, all four genes are WT                                                                    | <i>M. marinum</i> M | This study       |
| IV   | pSMT3:: <i>pe35/ppe68_1-FLAG/esxB_1/esxA_1-HA WT dSS PE35</i>      | hsp60 promoter, hygRO, deletion of the C-terminal 15 amino acids of PE35                                        | <i>M. marinum</i> M | This study       |
| V    | pSMT3:: <i>pe35/ppe68_1-FLAG/esxB_1/esxA_1-HA WT dSS EsxB_1</i>    | hsp60 promoter, hygRO, deletion of the C-terminal 21 amino acids of EsxB_1                                      | <i>M. marinum</i> M | This study       |
| VI   | pMV:: <i>pe35/ppe68_1WT-FLAG PPE68_1 SWAP</i>                      | hsp60 promoter, KanR, integrative, <i>ppe68_1</i> carried <i>espG5</i> chaperone binding domain of <i>ppe18</i> | <i>M. marinum</i> M | This study       |
| VII  | pSMT3:: <i>pe35/ppe68_1-FLAG/esxB_1/esxA_1-HA SINGLE SWAP</i>      | hsp60 promoter, hygRO, <i>ppe68_1</i> carried <i>espG5</i> chaperone binding domain of <i>ppe18</i>             | <i>M. marinum</i> M | This study       |
| VIII | pSMT3:: <i>pe35/ppe68_1-FLAG/esxB_1/esxA_1-HA DOUBLE SWAP</i>      | similar to number VII, plus <i>esxB_1</i> carries secretion signal of <i>esxM</i>                               | <i>M. marinum</i> M | This study       |
| IX   | pSMT3:: <i>pe35/ppe68_1-FLAG/esxB_1/esxA_1-HA TRIPLE SWAP</i>      | similar to number VIII, plus <i>pe35</i> carries secretion signal of <i>pe31</i>                                | <i>M. marinum</i> M | This study       |
| X    | pSMT3:: <i>pe35/ppe68_1-FLAG/esxB_1/esxA_1-HA EsxB_1 SWAP</i>      | hsp60 promoter, hygRO, <i>esxB_1</i> carries secretion signal of <i>esxM</i>                                    | <i>M. marinum</i> M | This study       |
| XI   | pSMT3:: <i>pe35/ppe68_1-FLAG/esxB_1/esxA_1-HA EsxB_1 PE35 SWAP</i> | similar to number X, plus <i>pe35</i> carries secretion signal of <i>pe31</i>                                   | <i>M. marinum</i> M | This study       |

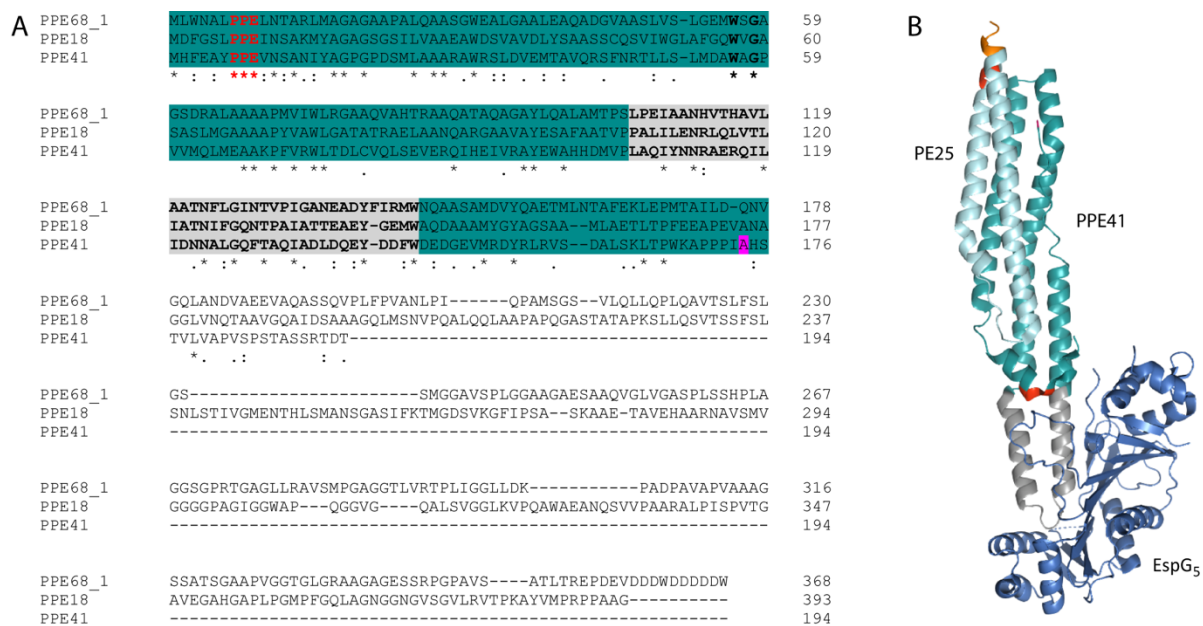

**Figure S1.** (A) Sequence alignment of PPE proteins used in this study. The alignment also contains PPE41 from *M. tuberculosis*, which structure is shown in (B). The conserved N-terminal domain of PPE proteins, with an approximate length of 180 amino acids, are indicated in green. The EspG binding domain that was exchanged in the study is indicated in grey. The conserved PPE motifs are depicted in red; the WxG motifs are depicted in bold and the pink amino acid indicates the most C-terminal amino acid visible in the crystal structure of the PPE41, shown in (B). (B) Solved structure of PE25-PPE41-EspG<sub>5</sub> from *M. tuberculosis* (22). PE25 protein is indicated in light blue, PPE41 in green and the EspG<sub>5</sub> chaperone in dark blue. The PE and PPE motifs are indicated in red and the general secretion motif (YxxxD/E) in the PE protein that is only partly solved, is indicated in orange. The most C-terminal amino acid of the PPE41 visible in the crystal structure is indicated in pink, similar as under (A).

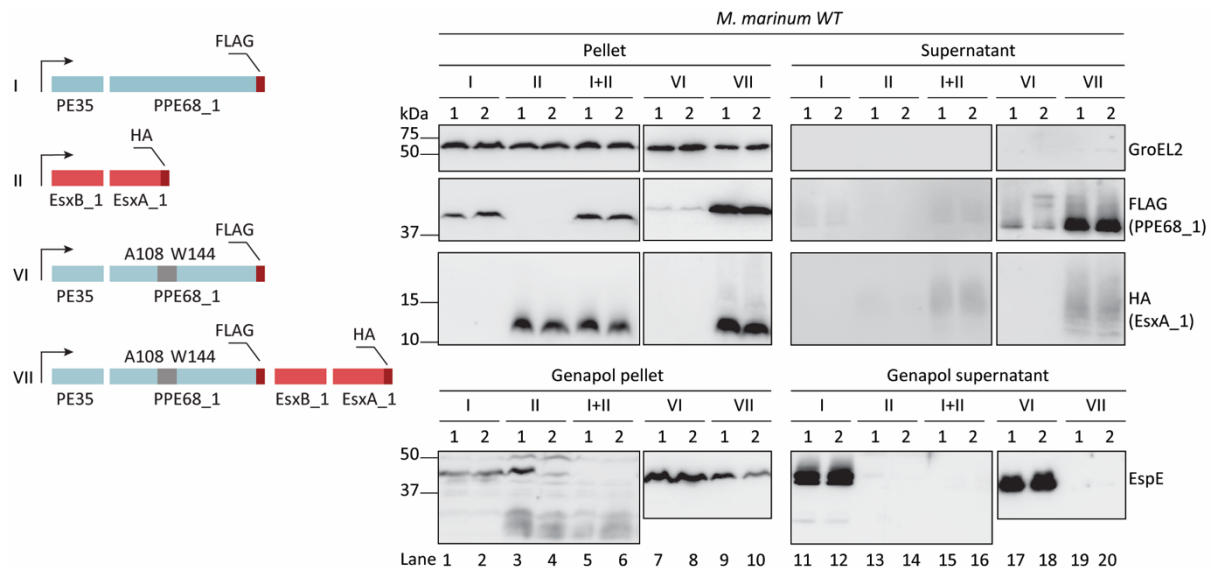

**Figure S2.** Overexpression of EsxA<sub>1</sub> interferes with EspE secretion and this secretion is not restored by co-overexpressing or rerouting of PE35/PPE68<sub>1</sub> via ESX-5. A schematic representation of the different constructs used are shown on the left. The genes encoding the *M. marinum* ESX-1 substrates PE35/PPE68<sub>1</sub> (in blue), PE35/PPE68<sub>1</sub> containing an EspG<sub>5</sub> chaperone binding domain (in blue and grey) and EsxB<sub>1</sub>/EsxA<sub>1</sub> (in pink) are either expressed from separate *hsp60* promoters (I, II, VI) or co-expressed under the same *hsp60* promoter (VII). Constructs I and VI are expressed from integrative pMV plasmids, while constructs II and VII are expressed from multicopy pSMT3 vectors. Immunoblot analysis of the cell pellet and culture supernatant fractions of WT *M. marinum* using an HA antibody to detect EsxA<sub>1</sub>-HA, a FLAG-antibody to detect PPE68<sub>1</sub>-FLAG, an EsxA antibody, detecting both endogenous and exogenous EsxA paralogues, and a GroEL2 antibody to detect the intracellular control protein GroEL2. Surface-localized EspE was extracted from bacterial cell pellets using Genapol X-080, resulting in Genapol pellet and supernatant fractions. These fractions were immune-stained with EspE antibodies. Equivalent OD units of cell pellets or Genapol pellet (0.2 OD unit) and culture supernatants or Genapol supernatants (0.5 OD unit) are shown. Numbers indicate two independent *M. marinum* colonies carrying the same construct.

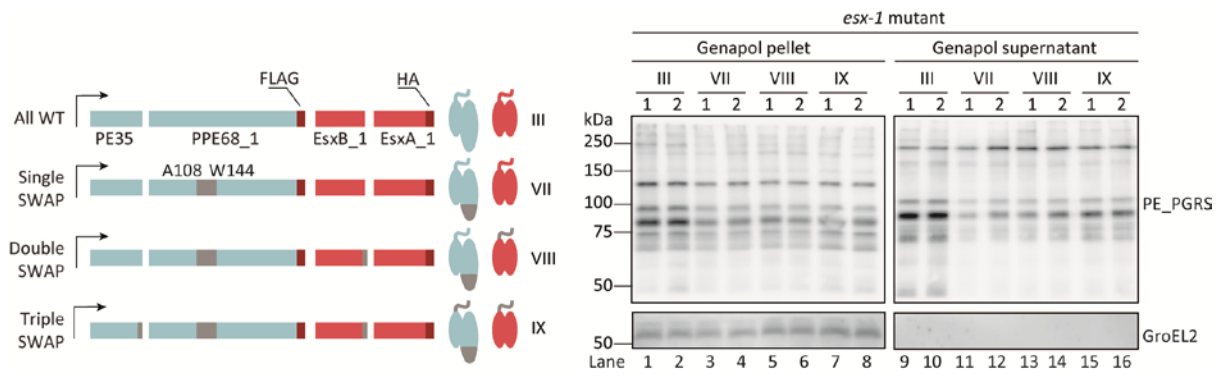

**Figure S3.** Rerouted PPE68\_1 and EsxA\_1 compete with endogenous ESX-5 substrates for secretion. Immunoblot analysis of the surface-localized ESX-5 dependent PE\_PGRS substrates in the *esx-I* mutant strain overexpressing PE35/PPE68\_1/EsxB\_1/EsxA\_1 variants. The fractions of enriched cell surface proteins (Genapol supernatant) were collected from the bacterial cell pellets (Genapol pellet) using Genapol X-080. Equivalent OD units were loaded; 0.2 OD for pellet and 0.5 OD for Genapol supernatants. Numbers indicate two independent *M. marinum* colonies carrying the same construct.

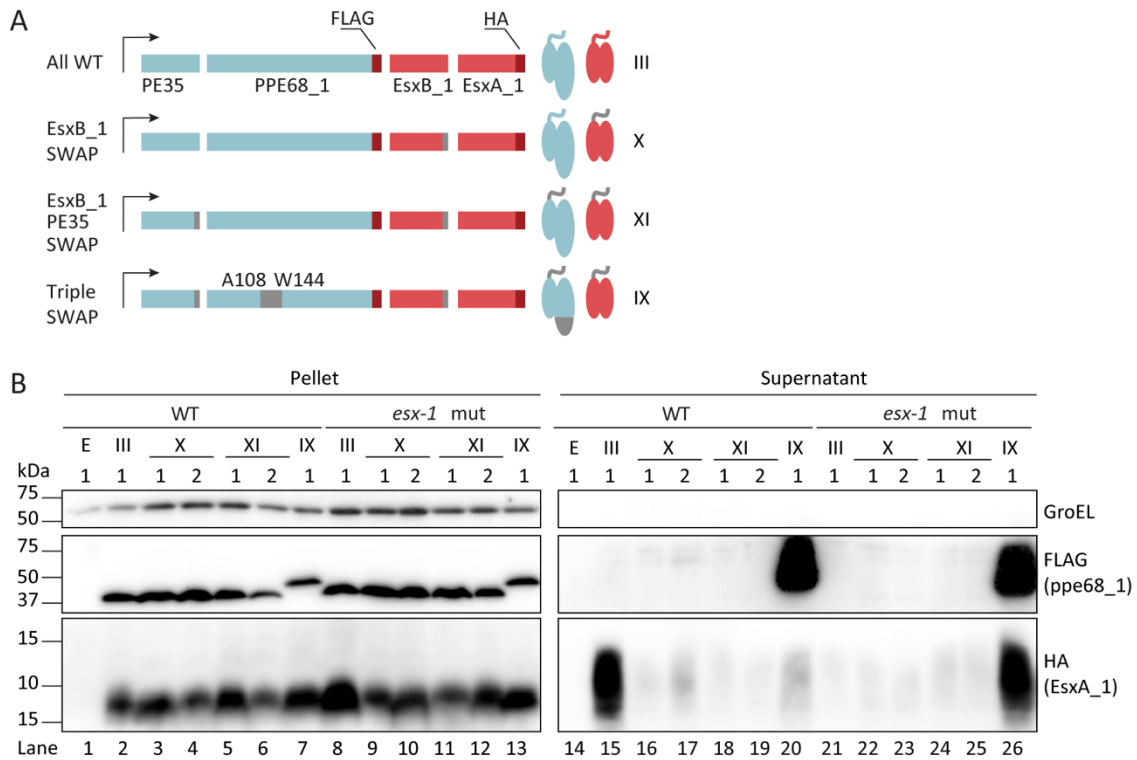

**Figure S4.** EsxA<sub>1</sub> is not rerouted to ESX-5 when the C-terminal domains of EsxB<sub>1</sub> and PE35 are replaced with equivalent domains of EsxM and PE31, respectively. (A) Schematic representation of the different constructs used in the secretion analysis. The introduced sequences of the ESX-5 substrates EsxM, PE31 and PPE18 are indicated in grey. The FLAG-tag on PPE68<sub>1</sub> and HA-tag on EsxA<sub>1</sub> are indicated in red. (B) Immunoblot analysis of EsxA<sub>1</sub> as detected with an HA antibody, PPE68<sub>1</sub> as probed with a FLAG antibody, and intracellular GroEL2 by a GroEL2 antibody, in pellet and supernatant fractions. Different derivatives of PE35/PPE68<sub>1</sub>/EsxB<sub>1</sub>/EsxA<sub>1</sub> were tested in WT *M. marinum* and an *eccCb<sub>1</sub>* mutant (*esx-1* mutant). Equivalent OD units of cell pellets (0.2 OD unit) and culture supernatants (0.5 OD unit) are shown. Numbers indicate two independent *M. marinum* colonies carrying the same construct. The minor HA signals that could be observed in the supernatants of the WT strain carrying EsxB<sub>1</sub> SWAP (construct X) and PE35 EsxB<sub>1</sub> SWAP (construct XI) were comparable to the signals in the supernatant fractions of the *esx-1* mutant carrying the ALL WT construct (construct III). These were therefore considered background signals, probably the result of minor cell lysis.
